# Supplementary material
Source: Copernicus journal article supplement (doi:10.5194/acp-26-7287-2026)
Supplement: Supplementary file 1 [file acp-26-7287-2026-supplement.pdf]

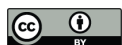

*Supplement of*

**Microphysical properties and light absorption enhancement of refractory black carbon aerosols in the central Arctic marine boundary layer: role of warm airmass intrusions on mixing state**

**Babu Suja Arun et al.**

*Correspondence to:* Babu Suja Arun (arun.babu@tropos.de)

The copyright of individual parts of the supplement might differ from the article licence.

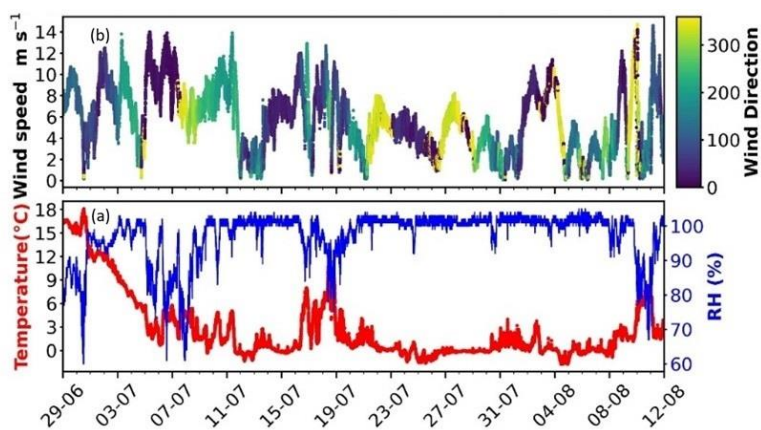

**Figure S1:** (a) Ambient temperature (red) and relative humidity (blue), (b) wind speed and wind direction measured during ATWAICE.

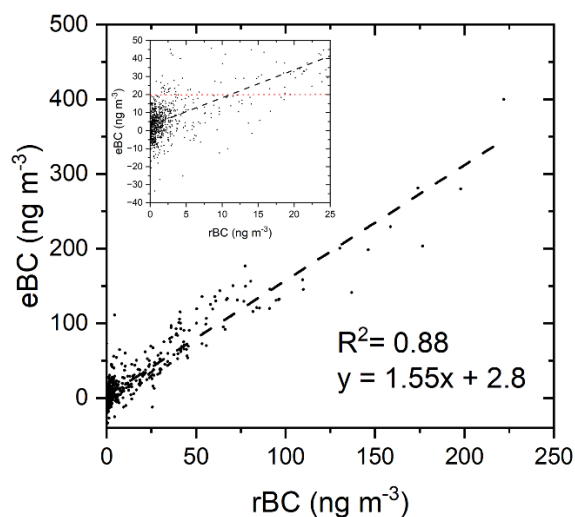

**Figure S2:** correlation between eBC measured by MAAP and rBC measured by SP2. Red dotted lines in the inset represents the value below which eBC becomes unreliable.

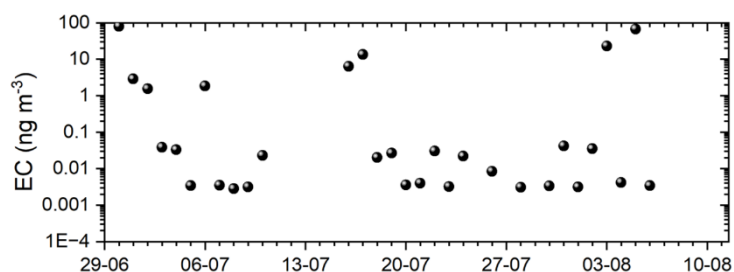

**Figure S3:** Temporal variabilities in elemental carbon concentrations measured using the thermo-optical transmission method (Birch and Cary, 1996). 0.002 ng m<sup>-3</sup> represents the detection limit of the instrument.

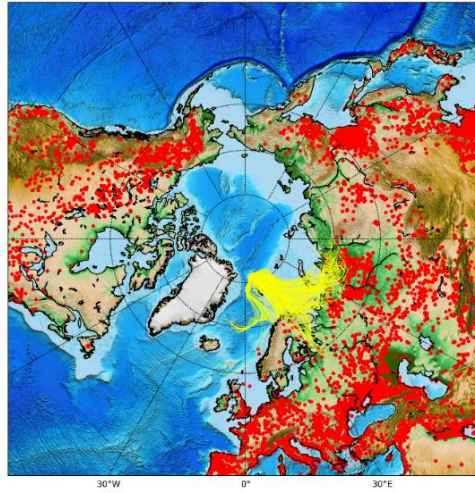

**Figure S4:** VIIRS fire pixel counts along with the hysplit air mass back trajectories during the first warm air mass intrusion period (WA1).

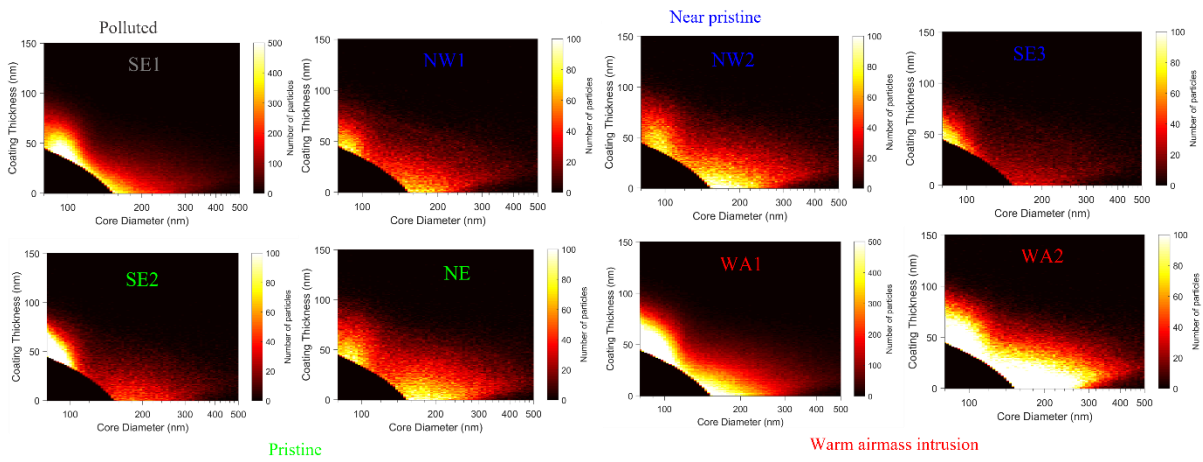

**Figure S5:** Size segregated coating thickness of rBC particles during the campaign. The colour bar indicates the number of particles in each of the size bins.

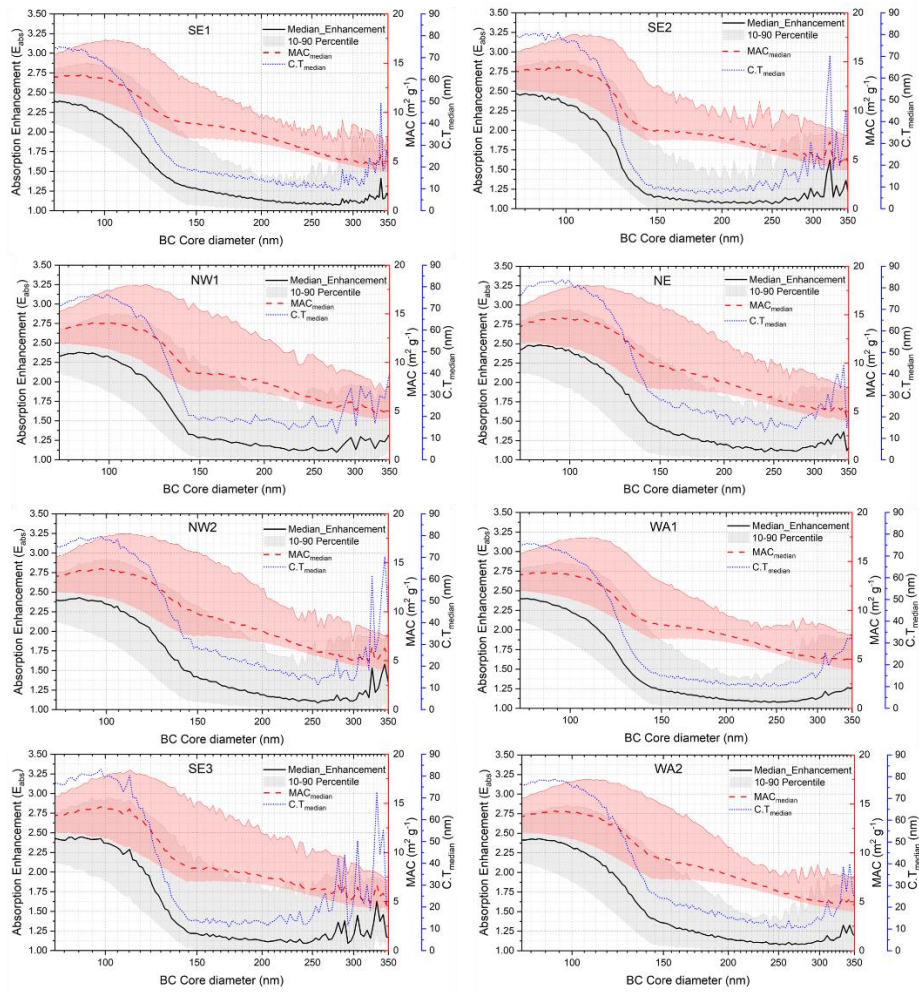

**Figure S6:** Size resolved absorption enhancement of rBC particles and Mass absorption cross section. The x-axis denotes the black carbon core diameter (nm); the y-axis (left) indicates the absorption enhancement factor, which quantifies the ratio of the absorption cross-section of coated BC particles to that of uncoated rBC cores of the same size. Median values are plotted as black solid lines, with the 10<sup>th</sup> to 90<sup>th</sup> percentile range shaded in grey to show variability.

**Table S1:** Summary of previously reported light absorption enhancement values ( $E_{abs}$ ) for black carbon from different environments.

| $E_{abs}$ | Wavelength<br>(nm) | Location                 | Method                                          | Reference            |
|-----------|--------------------|--------------------------|-------------------------------------------------|----------------------|
| 1.1-1.6   | 550                | Arctic                   | Core-shell Mie theory                           | Present study        |
| 1.5       | 550                | Pearl River Delta, China | Filter based with minimum R-squared method      | Wu, C. et al. (2018) |
| 1.36      | 550                | Thumba                   | Core-shell Mie theory                           | Nithin et al. (2026) |
| 1.3       | 550                | Qinghai-Tibet Plateau    | Core-shell Mie theory                           | Zeng et al. (2024)   |
| 1.06      | 532                | California, USA          | Thermodenuder + photoacoustic absorption method | Cappa et al. (2012)  |

|      |     |                                                        |                                                       |                     |
|------|-----|--------------------------------------------------------|-------------------------------------------------------|---------------------|
| 1.06 | 532 | Noto Peninsula, Japan                                  | Thermodenuder +<br>photoacoustic absorption<br>method | Ueda et al. (2016)  |
| 1.38 | 532 | Boulder, Colorado, USA                                 | Thermodenuder +<br>photoacoustic absorption<br>method | Lack et al. (2012)  |
| 1.2  | 550 | Xianghe, North China<br>Plain, China                   | Core-shell Mie theory                                 | Zhang et al. (2023) |
| 1.42 | 532 | Nanjing, China                                         | Thermodenuder +<br>photoacoustic absorption<br>method | Ma et al. (2020)    |
| 1.15 | 550 | Beijing, China                                         | Core-shell Mie theory                                 | Liu et al. (2020)   |
| 1.69 | 532 | Shanghai, China                                        | TD-CRDS/nephelometer                                  | Zhai et al. (2022)  |
| 1.83 | 550 | Biomass burning,<br>multiple sites/global<br>synthesis | Filter-photometer-based<br>compilation                | Asmi et al. (2025)  |
| 1.59 | 550 | Remote, multiple<br>sites/global synthesis             | Filter-photometer-based<br>compilation                | Asmi et al. (2025)  |
| 1.38 | 550 | Urban, multiple<br>sites/global synthesis              | Filter-photometer-based<br>compilation                | Asmi et al. (2025)  |

**Table S2:** Summary of previously reported mass absorption cross-section values of black carbon from different environments.

| <b>MAC</b> | <b>Wavelength<br/>(nm)</b> | <b>Location</b>              | <b>Method</b>                                          | <b>Reference</b>      |
|------------|----------------------------|------------------------------|--------------------------------------------------------|-----------------------|
| 6.5-8.7    | 550                        | Arctic                       | Core-shell Mie theory                                  | Present study         |
| 5          | 550                        | Alert, Canada                | Particle soot absorption<br>photometer with EC and SP2 | Sharma et al. (2017)  |
| 13.3       | 530                        | Texas, USA                   | Particle soot absorption<br>photometer with SP2        | Schwarz et al. (2008) |
| 10.38      | 522                        | Aspvreten, Sweden            | Particle soot absorption<br>photometer with EC         | Zanatta et al. (2016) |
| 9.54       | 525                        | Birkenes, Norway             | Particle soot absorption<br>photometer EC              | Zanatta et al. (2016) |
| 12.32      | 565                        | Jeju Island, Korea           | Particle soot absorption<br>photometer with EC         | Kondo et al. (2009)   |
| 6.4        | 565                        | Gosan Climate<br>Observatory | COSMOS with EC                                         | Cho et al. (2019)     |

|       |     |                                                  |                                             |                       |
|-------|-----|--------------------------------------------------|---------------------------------------------|-----------------------|
| 7     | 565 | ACE-Asia, C-130 flights below 2km                | Particle soot absorption photometer with EC | Clarke et al. (2004)  |
| 10.12 | 532 | Cool, USA                                        | Photoacoustic spectrometer with SP2         | Gyawali et al. (2017) |
| 3.1   | 532 | Jeju Island, Korea                               | Photoacoustic spectrometer with EC          | Flowers et al. (2010) |
| 8.4   | 532 | Karlsruhe, Germany                               | photoacoustic absorption + SP2              | Linke et al. (2016)   |
| 7.5   | 532 | California, USA                                  | Photoacoustic absorption + SP2<br>rBC mass  | Cappa et al. (2019)   |
| 6.5   | 532 | South China                                      | Photoacoustic absorption + SP2<br>rBC mass  | Lan et al. (2013)     |
| 11.8  | 532 | Nanjing, China                                   | Photoacoustic soot spectrometer + SP-AMS    | Ma et al. (2020)      |
| 14.7  | 550 | Biomass burning, multiple sites/global synthesis | Filter-photometer-based compilation         | Asmi et al. (2025)    |
| 12.8  | 550 | Remote, multiple sites/global synthesis          | Filter-photometer-based compilation         | Asmi et al. (2025)    |
| 11    | 550 | Urban, multiple sites/global synthesis           | Filter-photometer-based compilation         | Asmi et al. (2025)    |
